# Supplementary material for: Diabetes, metformin and glucose lowering therapies after myocardial infarction: Insights from the SWEDEHEART registry
Source: PubMed Central journal article supplement — Diab Vasc Dis Res. 2020 Nov 24;17(6):1479164120973676. doi: 10.1177/1479164120973676 (PMC7919225; doi:10.1177/1479164120973676), 2020-11-24

**Supplemental Table 1.** Patient characteristics at baseline median (Inter Quartile Range; IQR) or n (%) stratified by diabetes status and glucose lowering treatment. An individual patient can only be classified into one group.

|                                 | Diabetes |                  |                    |                  |                  |                       |                  |                              |                      |                                  | No Diabetes           |                                               |                                 |                 |
|---------------------------------|----------|------------------|--------------------|------------------|------------------|-----------------------|------------------|------------------------------|----------------------|----------------------------------|-----------------------|-----------------------------------------------|---------------------------------|-----------------|
|                                 | n        | Diet (n=3091)    | Metformin (n=3982) | SU (n=374)       | Insulin (n=3570) | SGLT2i/GLP1RA (n=888) | DPP4 (n=210)     | Insulin + Metformin (n=2034) | Insulin + SU (n=165) | Unspecified combination (n=2042) | No Diabetes (n=52887) | No Diabetes + unspecified combination (n=156) | No diabetes + Metformin (n=871) | p-value overall |
| <b>Clinical characteristics</b> |          |                  |                    |                  |                  |                       |                  |                              |                      |                                  |                       |                                               |                                 |                 |
| Age (years)                     | 70270    | 73 (58-88)       | 69 (55-83)         | 77 (65-89)       | 72 (57-87)       | 65 (52-78)            | 74 (63-85)       | 69 (55-83)                   | 76 (62-90)           | 69 (55-83)                       | 69 (53-85)            | 70 (51-89)                                    | 65 (52-78)                      | <0.001          |
| Sex (male)                      | 70270    | 2060 (66.6)      | 2887 (72.5)        | 252 (67.4)       | 2223 (62.3)      | 645 (72.6)            | 149 (71.0)       | 1440 (70.8)                  | 106 (64.2)           | 1442 (70.6)                      | 37038 (70.0)          | 111 (71.2)                                    | 659 (75.7)                      | <0.001          |
| Current smoker                  | 70269    | 547 (17.7)       | 920 (23.1)         | 51 (13.6)        | 520 (14.6)       | 175 (19.7)            | 28 (13.3)        | 413 (20.3)                   | 22 (13.3)            | 405 (19.8)                       | 12126 (22.9)          | 45 (28.8)                                     | 272 (31.2)                      | <0.001          |
| BMI (kg/m <sup>2</sup> )        | 68807    | 27.6 (21.5-33.7) | 28.4 (22.4-34.5)   | 27.0 (20.9-33.1) | 27.9 (21.4-34.4) | 31.4 (24.8-38.0)      | 28.4 (21.8-35.0) | 29.5 (23.2-35.8)             | 28.3 (21.6-35.0)     | 28.7 (22.6-34.8)                 | 26.3 (21.3-31.3)      | 27.4 (21.1-33.7)                              | 28.9 (22.8-35.0)                | <0.001          |
| Weight (kg)                     | 69769    | 81 (60-102)      | 85 (63-107)        | 79 (59-99)       | 82 (61-103)      | 94 (72-116)           | 85 (63-108)      | 88 (66-110)                  | 84 (63-105)          | 85 (63-107)                      | 80 (60-100)           | 82 (58-106)                                   | 88 (66-110)                     | <0.001          |
| Killip class I                  | 60819    | 2477 (93.8)      | 3250 (95.0)        | 274 (91.9)       | 2691 (91.2)      | 717 (94.0)            | 169 (96.6)       | 1596 (93.5)                  | 136 (95.1)           | 1644 (93.5)                      | 44074 (95.7)          | 132 (94.3)                                    | 731 (95.6)                      | <0.001          |
| <b>Previous disease</b>         |          |                  |                    |                  |                  |                       |                  |                              |                      |                                  |                       |                                               |                                 |                 |
| Myocardial infarction           | 70270    | 945 (30.6)       | 996 (25.0)         | 118 (31.6)       | 1314 (36.8)      | 252 (28.4)            | 53 (25.2)        | 648 (31.9)                   | 57 (34.5)            | 626 (30.7)                       | 7872 (14.9)           | 27 (17.3)                                     | 116 (13.3)                      | <0.001          |
| Heart failure                   | 70270    | 378 (12.2)       | 254 (6.4)          | 61 (16.3)        | 680 (19.0)       | 89 (10.0)             | 29 (13.8)        | 215 (10.6)                   | 19 (11.5)            | 215 (10.5)                       | 2163 (4.1)            | 8 (5.1)                                       | 26 (3.0)                        | <0.001          |
| PAD                             | 70270    | 256 (8.3)        | 184 (4.6)          | 31 (8.3)         | 480 (13.4)       | 52 (5.9)              | 20 (9.5)         | 116 (5.7)                    | 18 (10.9)            | 103 (5.0)                        | 1791 (3.4)            | 4 (2.6)                                       | 15 (1.7)                        | <0.001          |
| PCI                             | 70270    | 673 (21.8)       | 745 (18.7)         | 91 (24.3)        | 927 (26.0)       | 215 (24.2)            | 41 (19.5)        | 519 (25.5)                   | 41 (24.8)            | 490 (24.0)                       | 5912 (11.2)           | 27 (17.3)                                     | 104 (11.9)                      | <0.001          |
| CABG                            | 70269    | 328 (10.6)       | 345 (8.7)          | 51 (13.6)        | 585 (16.4)       | 75 (8.4)              | 17 (8.1)         | 265 (13.0)                   | 23 (13.9)            | 240 (11.8)                       | 2410 (4.6)            | 9 (5.8)                                       | 45 (5.2)                        | <0.001          |
| Stroke                          | 70270    | 366 (11.8)       | 297 (7.5)          | 57 (15.2)        | 476 (13.3)       | 74 (8.3)              | 18 (8.6)         | 203 (10.0)                   | 26 (15.8)            | 198 (9.7)                        | 2807 (5.3)            | 14 (9.0)                                      | 18 (2.1)                        | <0.001          |
| Renal failure                   | 70270    | 261 (8.4)        | 37 (0.9)           | 24 (6.4)         | 586 (16.4)       | 39 (4.4)              | 30 (14.3)        | 34 (1.7)                     | 8 (4.8)              | 77 (3.8)                         | 1007 (1.9)            | 8 (5.1)                                       | 2 (0.2)                         | <0.001          |
| Cancer                          | 70270    | 165 (5.3)        | 118 (3.0)          | 23 (6.1)         | 191 (5.4)        | 17 (1.9)              | 9 (4.3)          | 58 (2.9)                     | 9 (5.5)              | 66 (3.2)                         | 1142 (2.2)            | 8 (5.1)                                       | 16 (1.8)                        | <0.001          |
| Dementia                        | 70270    | 13 (0.4)         | 10 (0.3)           | 3 (0.8)          | 21 (0.6)         | 0 (0)                 | 0 (0)            | 7 (0.3)                      | 1 (0.6)              | 5 (0.2)                          | 147 (0.3)             | 1 (0.6)                                       | 0 (0)                           | 0.028           |
| Hypertension                    | 70268    | 2356 (76.2)      | 2892 (72.6)        | 300 (80.2)       | 2922 (81.8)      | 703 (79.2)            | 179 (85.2)       | 1597 (78.5)                  | 134 (81.2)           | 1641 (80.4)                      | 25886 (48.9)          | 84 (53.8)                                     | 451 (51.8)                      | <0.001          |
| Hyperlipidaemia                 | 70270    | 1716 (55.5)      | 2180 (54.7)        | 231 (61.8)       | 2438 (68.3)      | 586 (66.0)            | 130 (61.9)       | 1339 (65.8)                  | 116 (70.3)           | 1349 (66.1)                      | 15853 (30.0)          | 53 (34.0)                                     | 250 (28.7)                      | <0.001          |
| <b>Biochemistry</b>             |          |                  |                    |                  |                  |                       |                  |                              |                      |                                  |                       |                                               |                                 |                 |
| Blood glucose (mmol/L)          | 61032    | 8.2 (4.4-12.6)   | 9.4 (5.2-13.6)     | 10.3 (5.1-15.6)  | 12.0 (4.8-19.2)  | 12.2 (6.1-18.2)       | 10.0 (5.6-14.2)  | 12.5 (5.2-19.8)              | 13.1 (6.7-19.5)      | 11.8 (5.7-17.9)                  | 6.5 (4.6-8.4)         | 9.7 (4.8-14.6)                                | 8.4 (4.8-12.0)                  | <0.001          |
| HbA1c (mmol/mol)                | 15513    | 45 (35-55)       | 52 (40-64)         | 53 (39-67)       | 64 (41-87)       | 66 (41-91)            | 51 (41-61)       | 67 (38-96)                   | 69 (39-99)           | 63 (41-85)                       | 38 (33-42)            | 53 (25-81)                                    | 46 (34-58)                      | <0.001          |
| HbA1c (%)                       | 15513    | 6.3 (5.4-7.2)    | 6.9 (5.8-8.0)      | 7.0 (5.7-8.3)    | 8.0 (5.9-10.1)   | 8.2 (5.9-10.5)        | 6.8 (5.9-7.7)    | 8.3 (5.6-10.9)               | 8.5 (5.7-11.2)       | 7.9 (5.9-9.9)                    | 5.6 (5.2-6.0)         | 7.0 (4.4-9.6)                                 | 6.4 (5.3-7.5)                   | <0.001          |
| CRP (mg/L)                      | 63463    | 5 (0-13)         | 5 (0-12)           | 5 (0-17)         | 6 (0-21)         | 5 (0-15)              | 5 (0-12)         | 5 (0-13)                     | 6 (0-15)             | 5 (0-14)                         | 4 (0-10)              | 5 (0-16)                                      | 5 (0-11)                        | <0.001          |
| Creatinine (mmol/L)             | 69383    | 86 (48-124)      | 76 (51-101)        | 86 (48-124)      | 95 (40-151)      | 78 (47-109)           | 107 (49-164)     | 77 (50-104)                  | 89 (46-132)          | 80 (47-113)                      | 79 (54-104)           | 79 (48-110)                                   | 77 (56-98)                      | <0.001          |

|                                   |       |             |             |            |             |            |            |             |            |             |              |            |            |        |
|-----------------------------------|-------|-------------|-------------|------------|-------------|------------|------------|-------------|------------|-------------|--------------|------------|------------|--------|
| <b>Indication</b>                 | 70270 |             |             |            |             |            |            |             |            |             |              |            |            | <0.001 |
| NSTEMI                            |       | 2089 (67.6) | 2670 (67.1) | 268 (71.7) | 2618 (73.3) | 612 (68.9) | 146 (69.5) | 1439 (70.7) | 114 (69.1) | 1442 (70.6) | 31977 (60.5) | 86 (55.1)  | 506 (58.1) |        |
| STEMI                             |       | 1002 (32.4) | 1312 (32.9) | 106 (28.3) | 952 (26.7)  | 276 (31.1) | 64 (30.5)  | 595 (29.3)  | 51 (30.9)  | 600 (29.4)  | 20910 (39.5) | 70 (44.9)  | 365 (41.9) |        |
| <b>Angiographic findings</b>      | 70263 |             |             |            |             |            |            |             |            |             |              |            |            | <0.001 |
| Normal                            |       | 195 (6.3)   | 176 (4.4)   | 20 (5.4)   | 156 (4.4)   | 39 (4.4)   | 12 (5.7)   | 81 (4.0)    | 9 (5.5)    | 84 (4.1)    | 3916 (7.4)   | 12 (7.7)   | 29 (3.3)   |        |
| 1-vessel                          |       | 1054 (34.1) | 1507 (37.8) | 116 (31.1) | 941 (26.4)  | 290 (32.7) | 57 (27.1)  | 596 (29.3)  | 46 (27.9)  | 703 (34.4)  | 23816 (45.0) | 66 (42.3)  | 391 (44.9) |        |
| 2-vessel                          |       | 827 (26.8)  | 1080 (27.1) | 97 (26.0)  | 922 (25.8)  | 222 (25.0) | 54 (25.7)  | 566 (27.8)  | 49 (29.7)  | 575 (28.2)  | 13497 (25.5) | 43 (27.6)  | 262 (30.1) |        |
| 3-vessel                          |       | 724 (23.4)  | 911 (22.9)  | 96 (25.7)  | 1122 (31.4) | 251 (28.3) | 73 (34.8)  | 586 (28.8)  | 43 (26.1)  | 522 (25.6)  | 8390 (15.9)  | 23 (14.7)  | 144 (16.6) |        |
| Left main                         |       | 286 (9.3)   | 305 (7.7)   | 43 (11.5)  | 420 (11.8)  | 82 (9.2)   | 13 (6.2)   | 202 (9.9)   | 18 (10.9)  | 157 (7.7)   | 3206 (6.1)   | 12 (7.7)   | 43 (4.9)   |        |
| <b>Revascularisation method</b>   |       |             |             |            |             |            |            |             |            |             |              |            |            |        |
| PCI                               | 70270 | 2432 (78.7) | 3220 (80.9) | 293 (78.3) | 2640 (73.9) | 694 (78.2) | 154 (73.3) | 1573 (77.3) | 138 (83.6) | 1649 (80.8) | 44270 (83.7) | 132 (84.6) | 763 (87.6) | <0.001 |
| CABG ≤ months after index AMI     | 70270 | 34 (1.1)    | 68 (1.7)    | 2 (0.5)    | 49 (1.4)    | 15 (1.7)   | 7 (3.3)    | 41 (2.0)    | 4 (2.4)    | 28 (1.4)    | 483 (0.9)    | 1 (0.6)    | 11 (1.3)   |        |
| Stent during PCI                  | 57958 | 2118 (87.1) | 2897 (90.0) | 251 (85.7) | 2255 (85.4) | 616 (88.8) | 141 (91.6) | 1358 (86.3) | 122 (88.4) | 1450 (87.9) | 40367 (91.2) | 122 (92.4) | 712 (93.3) | <0.001 |
| Complete revascularisation        | 56139 | 1315 (56.5) | 1916 (61.7) | 147 (52.7) | 1281 (50.6) | 398 (60.0) | 80 (53.7)  | 830 (54.7)  | 67 (49.6)  | 953 (59.9)  | 28568 (66.5) | 74 (56.9)  | 473 (63.0) | <0.001 |
| <b>Ejection fraction (EF%)</b>    | 61566 |             |             |            |             |            |            |             |            |             |              |            |            | <0.001 |
| EF ≥50%                           |       | 1467 (55.7) | 2173 (61.2) | 178 (56.2) | 1544 (51.3) | 446 (57.8) | 96 (55.5)  | 987 (57.0)  | 76 (52.4)  | 971 (56.5)  | 29953 (64.3) | 78 (54.9)  | 512 (65.9) |        |
| EF 40-49%                         |       | 618 (23.5)  | 760 (21.4)  | 72 (22.7)  | 730 (24.2)  | 174 (22.6) | 47 (27.2)  | 379 (21.9)  | 40 (27.6)  | 386 (22.4)  | 9749 (20.9)  | 33 (23.2)  | 152 (19.6) |        |
| EF 30-39%                         |       | 354 (13.4)  | 440 (12.4)  | 49 (15.5)  | 509 (16.9)  | 107 (13.9) | 20 (11.6)  | 250 (14.4)  | 16 (11.7)  | 251 (14.6)  | 5086 (10.9)  | 20 (14.1)  | 85 (10.9)  |        |
| EF <30%                           |       | 172 (6.5)   | 149 (4.2)   | 15 (4.7)   | 204 (6.8)   | 39 (5.1)   | 10 (5.8)   | 97 (5.6)    | 10 (6.9)   | 102 (5.9)   | 1510 (3.2)   | 11 (7.7)   | 23 (3.0)   |        |
| Unknown EF                        |       | 22 (0.8)    | 28 (0.8)    | 3 (0.9)    | 24 (0.8)    | 5 (0.6)    | 0 (0)      | 18 (1.0)    | 3 (2.1)    | 10 (0.6)    | 298 (0.6)    | 0 (0)      | 5 (0.6)    |        |
| <b>Medications at discharge</b>   |       |             |             |            |             |            |            |             |            |             |              |            |            |        |
| Aspirin                           | 70260 | 2861 (92.6) | 3764 (94.5) | 347 (92.8) | 3277 (91.8) | 828 (93.2) | 191 (91.0) | 1911 (94.0) | 150 (90.9) | 1926 (94.3) | 50196 (94.9) | 141 (90.4) | 842 (96.7) | <0.001 |
| Clopidogrel                       | 70260 | 924 (29.9)  | 901 (22.6)  | 137 (36.6) | 1154 (32.3) | 155 (17.5) | 47 (22.4)  | 505 (24.8)  | 55 (33.3)  | 501 (24.5)  | 12062 (22.8) | 41 (26.3)  | 117 (13.4) | <0.001 |
| Ticagrelor                        | 70260 | 1734 (56.1) | 2587 (65.0) | 187 (50.0) | 1908 (53.4) | 619 (69.7) | 126 (60.0) | 1234 (60.7) | 96 (58.2)  | 1271 (62.2) | 35562 (67.3) | 101 (64.7) | 684 (78.5) | <0.001 |
| Beta blockade                     | 70260 | 2782 (90.0) | 3641 (91.5) | 341 (91.2) | 3188 (89.3) | 811 (91.3) | 183 (87.1) | 1868 (91.8) | 153 (92.7) | 1872 (91.7) | 46990 (88.9) | 146 (93.6) | 801 (92.0) | <0.001 |
| ACE inhibitor                     | 70260 | 1730 (56.0) | 2542 (63.9) | 208 (55.6) | 1870 (52.4) | 478 (53.8) | 89 (42.4)  | 1274 (62.6) | 89 (53.9)  | 1200 (58.8) | 33885 (64.1) | 98 (62.8)  | 601 (69.0) | <0.001 |
| Angiotensin II receptor inhibitor | 70252 | 920 (29.8)  | 1133 (28.5) | 115 (30.7) | 1216 (34.1) | 340 (38.3) | 78 (37.1)  | 622 (30.6)  | 57 (34.5)  | 700 (34.3)  | 9890 (18.7)  | 36 (23.1)  | 177 (20.3) | <0.001 |
| Spirolacton                       | 70260 | 239 (7.7)   | 304 (7.6)   | 34 (9.1)   | 321 (9.0)   | 88 (9.9)   | 19 (9.0)   | 219 (10.8)  | 11 (6.7)   | 193 (9.5)   | 2346 (4.4)   | 9 (5.8)    | 36 (4.1)   | <0.001 |
| Eplerenon                         | 70260 | 42 (1.4)    | 68 (1.7)    | 8 (2.1)    | 59 (1.7)    | 42 (4.7)   | 2 (1.0)    | 44 (2.2)    | 3 (1.8)    | 42 (2.1)    | 754 (1.4)    | 5 (3.2)    | 23 (2.6)   | <0.001 |
| Statin                            | 70260 | 2881 (93.2) | 3848 (96.7) | 346 (92.5) | 3273 (91.7) | 853 (96.1) | 196 (93.3) | 1946 (95.7) | 155 (93.9) | 1947 (95.3) | 50549 (95.6) | 150 (96.2) | 854 (98.0) | <0.001 |
| Ezetemide                         | 70253 | 87 (2.8)    | 106 (2.7)   | 10 (2.7)   | 148 (4.1)   | 56 (6.3)   | 10 (4.8)   | 42 (2.1)    | 7 (4.2)    | 62 (3.0)    | 819 (1.5)    | 2 (1.3)    | 27 (3.1)   | <0.001 |

**Supplemental Table 2:** Glucose lowering drugs in patients with diabetes (n=16 356).

| <b>Glucose lowering drug</b> | <b>n (%)</b> |
|------------------------------|--------------|
| Any metformin                | 8287 (50.7)  |
| Any SU                       | 1863 (11.4)  |
| Any Insulin                  | 7044 (43.4)  |
| Any SGLT2i                   | 447 (2.7)    |
| Any GLP-1 RA                 | 513 (3.1)    |
| Any DPP4i                    | 1378 (8.4)   |

**Supplemental Table 3.** Unadjusted and adjusted risk (HR CI 95%) for MACE and MACE+ after index myocardial infarction in patients stratified by diabetes status and glucose lowering treatment. Diabetes patients on diet treatment served as a reference group with HR 1.0.

| <b>Event</b>                                 | <b>Events<br/>n (%)</b> | <b>Unadjusted<br/>HR (95% CI)</b> | <b>p-<br/>value</b> | <b>Adjusted*<br/>HR (95%CI)</b> | <b>p-<br/>value</b> |
|----------------------------------------------|-------------------------|-----------------------------------|---------------------|---------------------------------|---------------------|
| <i>MACE+</i>                                 |                         |                                   |                     |                                 |                     |
| <i>(MI, Heart failure, Stroke, Death)</i>    |                         |                                   |                     |                                 |                     |
| Diet                                         | 1212 (39)               | 1 (referent)                      |                     | 1 (referent)                    |                     |
| Monotherapy metformin                        | 1196 (30)               | 0.67 (0.62-0.72)                  | <0.001              | 0.92 (0.85-0.997)               | 0.042               |
| Monotherapy sulfonylurea                     | 192 (51)                | 1.15 (0.99-1.34)                  | 0.067               | 1.002 (0.86-1.17)               | 0.982               |
| Monotherapy insulin                          | 1986 (56)               | 1.48 (1.37-1.59)                  | <0.001              | 1.32 (1.23-1.42)                | <0.001              |
| Any SGLT2i/GLP-1 RA                          | 239 (27)                | 0.77 (0.67-0.88)                  | <0.001              | 1.07 (0.93-1.24)                | 0.334               |
| Monotherapy DPP4i                            | 77 (37)                 | 1.05 (0.83-1.32)                  | 0.698               | 1.05 (0.83-1.32)                | 0.704               |
| Insulin + metformin                          | 807 (40)                | 0.90 (0.83-0.99)                  | 0.027               | 1.13 (1.03-1.24)                | 0.009               |
| Insulin + sulfonylurea                       | 87 (53)                 | 1.25 (1.01-1.56)                  | 0.044               | 1.18 (0.95-1.48)                | 0.144               |
| Unspecified combination of GLD               | 791 (39)                | 0.91 (0.83-0.99)                  | 0.035               | 1.09 (0.996-1.20)               | 0.060               |
| No diabetes                                  | 13658 (26)              | 0.56 (0.53-0.59)                  | <0.001              | 0.82 (0.78-0.88)                | <0.001              |
| No diabetes + unspecified combination of GLD | 61 (39)                 | 1.07 (0.83-1.39)                  | 0.586               | 1.48 (1.14-1.92)                | 0.003               |
| No diabetes + monotherapy metformin          | 179 (21)                | 0.45 (0.38-0.52)                  | <0.001              | 0.82 (0.70-0.96)                | 0.013               |
| <i>MACE</i>                                  |                         |                                   |                     |                                 |                     |
| <i>(MI, Stroke, Death)</i>                   |                         |                                   |                     |                                 |                     |
| Diet                                         | 986 (32)                | 1 (referent)                      |                     | 1 (referent)                    |                     |
| Monotherapy metformin                        | 947 (24)                | 0.67 (0.61-0.73)                  | <0.001              | 0.91 (0.83-0.997)               | 0.042               |
| Monotherapy sulfonylurea                     | 157 (42)                | 1.15 (0.97-1.36)                  | 0.101               | 1.05 (0.88-1.24)                | 0.607               |
| Monotherapy insulin                          | 1628 (46)               | 1.45 (1.34-1.56)                  | <0.001              | 1.32 (1.22-1.43)                | <0.001              |
| Any SGLT2i/GLP-1 RA                          | 175 (20)                | 0.73 (0.62-0.86)                  | <0.001              | 1.007 (0.85-1.19)               | 0.936               |
| Monotherapy DPP4i                            | 58 (28)                 | 1.003 (0.77-1.31)                 | 0.985               | 1.02 (0.78-1.34)                | 0.867               |
| Insulin + metformin                          | 631 (31)                | 0.88 (0.80-0.97)                  | 0.012               | 1.10 (0.99-1.22)                | 0.069               |
| Insulin + sulfonylurea                       | 76 (46)                 | 1.34 (1.06-1.69)                  | 0.014               | 1.26 (0.99-1.60)                | 0.062               |
| Unspecified combination of GLD               | 597 (29)                | 0.85 (0.77-0.94)                  | 0.002               | 1.03 (0.93-1.14)                | 0.619               |
| No diabetes                                  | 10879 (21)              | 0.57 (0.53-0.61)                  | <0.001              | 0.83 (0.77-0.88)                | <0.001              |
| No diabetes + unspecified combination of GLD | 46 (29)                 | 1.002 (0.75-1.35)                 | 0.989               | 1.33 (0.99-1.80)                | 0.060               |
| No diabetes + monotherapy metformin          | 139 (16)                | 0.45 (0.38-0.54)                  | <0.001              | 0.79 (0.66-0.95)                | 0.012               |
| <i>Mortality</i>                             |                         |                                   |                     |                                 |                     |
| Diet                                         | 576 (19)                | 1 (referent)                      |                     | 1 (referent)                    |                     |
| Monotherapy metformin                        | 397 (10)                | 0.48 (0.42-0.54)                  | <0.001              | 0.81 (0.71-0.92)                | 0.002               |
| Monotherapy sulfonylurea                     | 106 (28)                | 1.29 (1.05-1.58)                  | 0.017               | 1.09 (0.88-1.34)                | 0.442               |
| Monotherapy insulin                          | 957 (27)                | 1.41 (1.27-1.56)                  | <0.001              | 1.30 (1.17-1.45)                | <0.001              |
| Any SGLT2i/GLP-1 RA                          | 52 (6)                  | 0.42 (0.32-0.56)                  | <0.001              | 0.96 (0.72-1.29)                | 0.802               |
| Monotherapy DPP4i                            | 26 (12)                 | 0.83 (0.56-1.23)                  | 0.358               | 0.90 (0.61-1.34)                | 0.601               |
| Insulin + metformin                          | 266 (13)                | 0.60 (0.52-0.70)                  | <0.001              | 0.98 (0.85-1.14)                | 0.801               |
| Insulin + sulfonylurea                       | 45 (27)                 | 1.23 (0.91-1.67)                  | 0.175               | 1.17 (0.86-1.61)                | 0.323               |
| Unspecified combination of GLD               | 244 (12)                | 0.58 (0.50-0.67)                  | <0.001              | 0.85 (0.73-0.99)                | 0.032               |
| No diabetes                                  | 4624 (9)                | 0.41 (0.38-0.45)                  | <0.001              | 0.69 (0.63-0.76)                | <0.001              |
| No diabetes + unspecified combination of GLD | 24 (15)                 | 0.93 (0.62-1.40)                  | 0.738               | 1.39 (0.92-2.09)                | 0.119               |
| No diabetes + monotherapy metformin          | 37 (4)                  | 0.21 (0.15-0.29)                  | <0.001              | 0.57 (0.41-0.80)                | 0.001               |

\* Adjusted for age, gender, smoking, creatinine, previous diagnosis of myocardial infarction/ heart failure/ CABG/ cancer/ dementia/ dialysis/ hypertension/ chronic obstructive pulmonary disease/ renal failure/ stroke/ peripheral artery disease, year, indication, hospital, angiographic findings, primary decision after angiography, cardiac chock and medications at discharge (ACE inhibitors, angiotensin II receptor antagonists, lipid lowering agents, aspirin, beta blockade, oral anticoagulants, other antiplatelet therapy).

GLD= Glucose lowering drugs

**Supplemental Figure 1a.** Proportions (% [n]) of glucose lowering treatment in patients with diabetes.

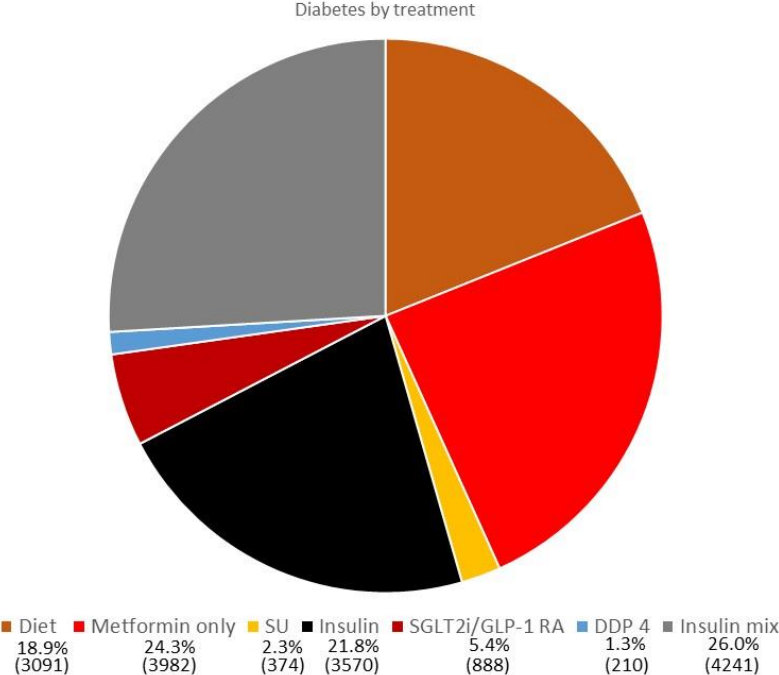

**Supplemental Figure 1b.** Proportions (% [n]) of glucose lowering treatment in patients without diabetes.

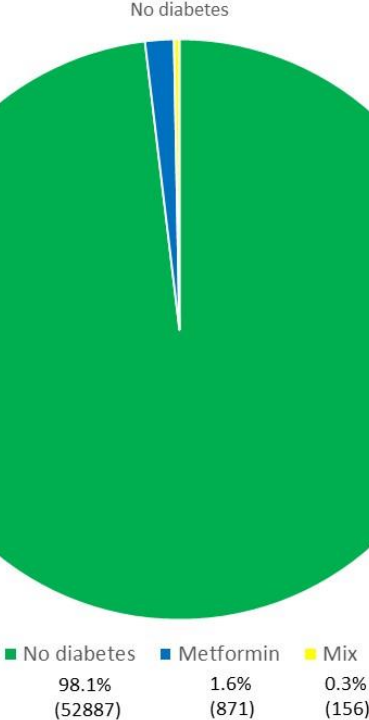

**Supplemental Figure 2.** Time to hospitalisation for MACE (first of myocardial infarction, stroke or death) after index myocardial infarction by (A) diabetes status and glucose lowering treatment and for clarity (B) by diabetes status and treatment with metformin.

**A.**

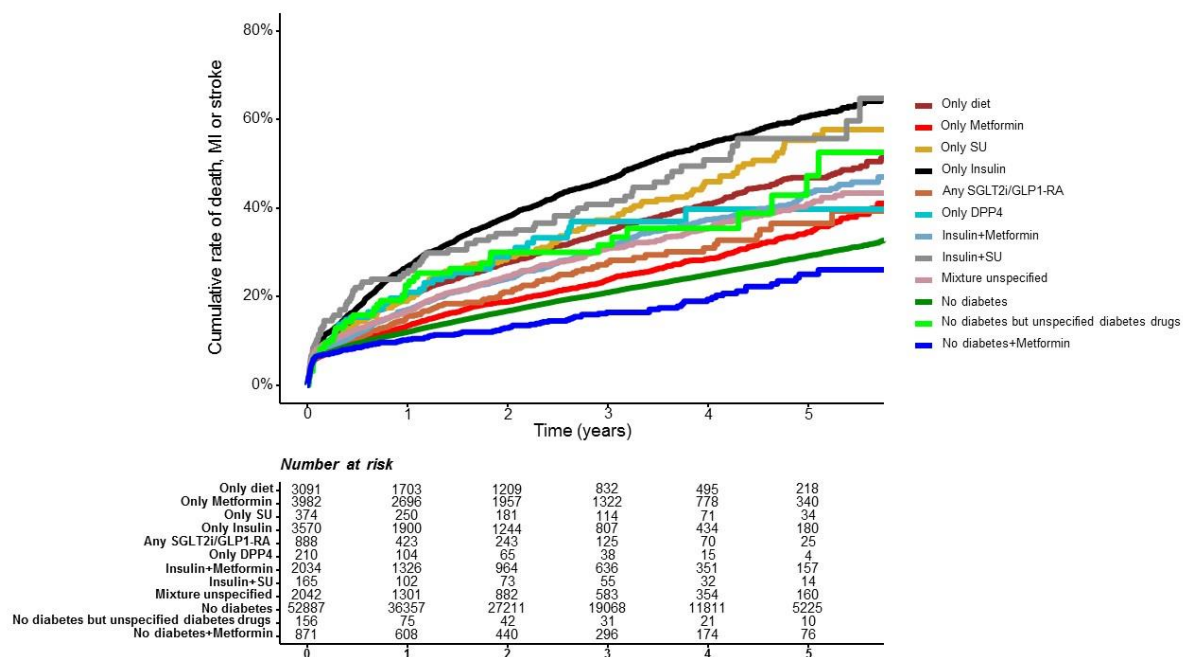

**B.**

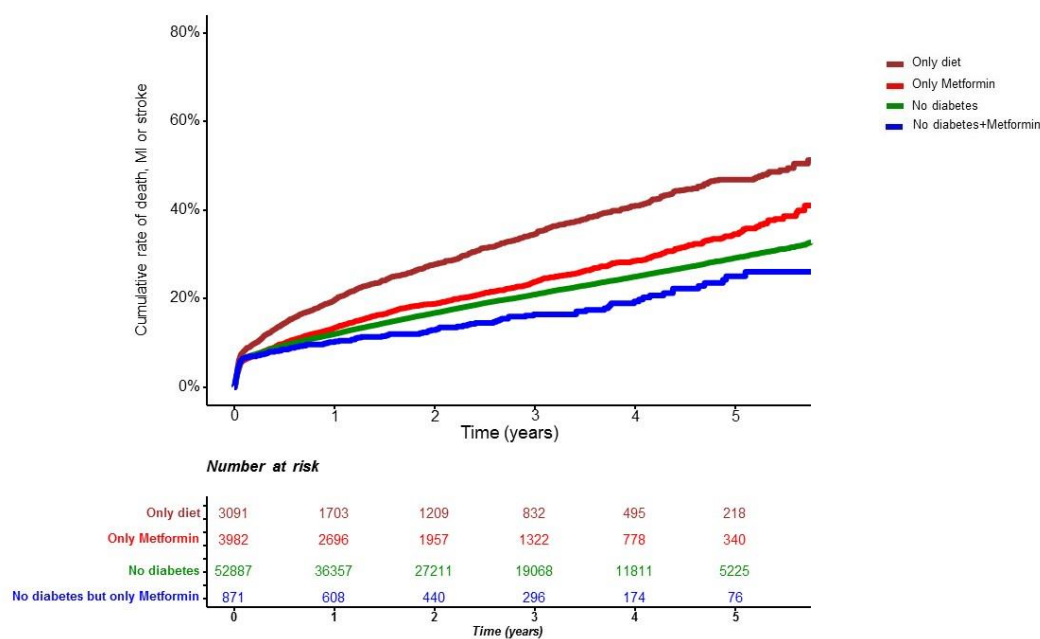

**Supplemental Figure 3.** Time to death after index myocardial infarction by (A) diabetes status and glucose lowering treatment and for clarity (B) by diabetes status and treatment with metformin.

**A.**

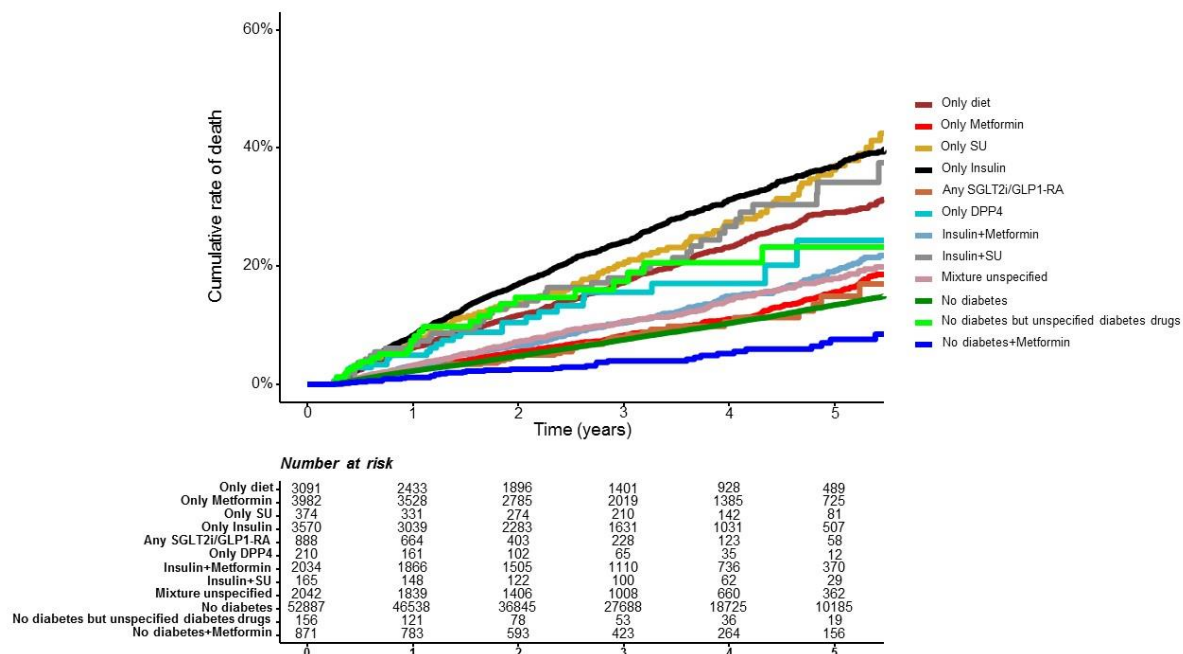

**B.**

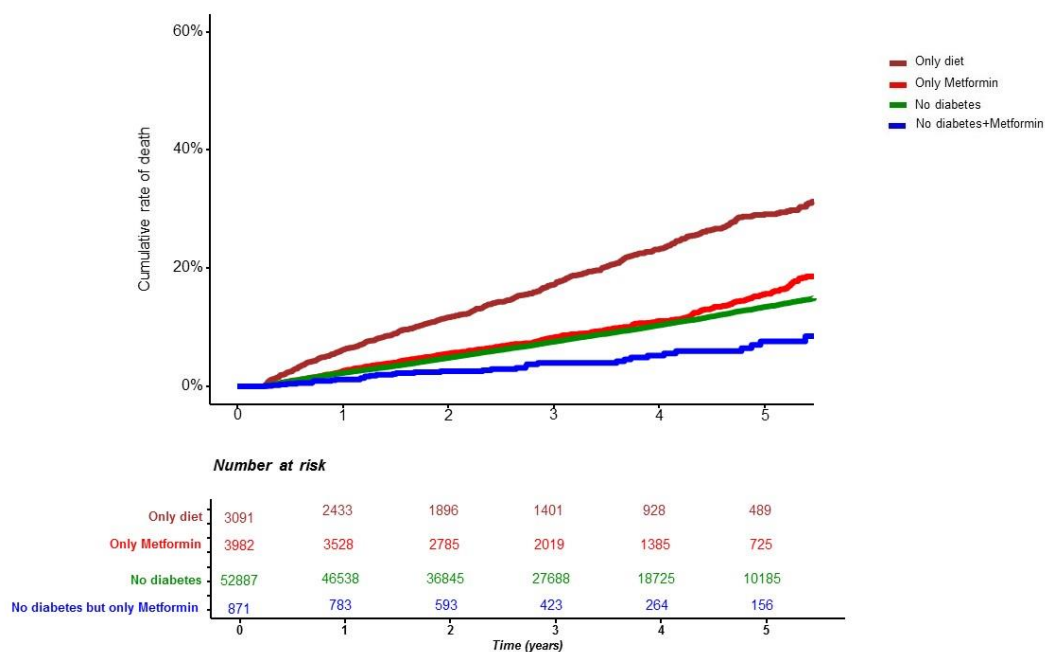

Supplement: sj-pdf-1-dvr-10.1177_1479164120973676.pdf [file sj-pdf-1-dvr-10.1177_1479164120973676.pdf]
